# Supplementary material for: Gaining confidence in high-throughput protein interaction networks
Source: Springer Nature journal article supplement (doi:10.1038/nbt924), 2003-12-14
Supplement: nbt924-S1.pdf [file nbt924-S1.pdf]

**Supplementary Table 1 Physical interaction data sources**

| Source                     | Power-law  | Number of proteins |              |         | Number of interactions |              |               |
|----------------------------|------------|--------------------|--------------|---------|------------------------|--------------|---------------|
|                            |            | All                | Med-<br>Conf | Hi-Conf | All                    | Med-<br>Conf | High-<br>Conf |
| Uetz I                     | -2.4±0.1   | 976                | 898          | 648     | 894                    | 718          | 444           |
| Uetz II                    | -1.7±0.1   | 494                | 75           | 49      | 505                    | 66           | 40            |
| Ito core                   | -1.8±0.2   | 780                | 668          | 580     | 747                    | 538          | 423           |
| Ito full                   | -1.4±0.1   | 3253               | 1039         | 728     | 4,358                  | 800          | 537           |
| Tong                       | -1.3±0.2   | 142                | 19           | 16      | 229                    | 29           | 18            |
| Lit                        | -2.2±0.1   | 797                | 674          | 455     | 776                    | 574          | 353           |
| All<br>Y2H                 |            | 3941               | 1941         | 1332    | 6,395                  | 1,868        | 1137          |
| Gavin                      | -1.16±0.05 | 1351               | 1347         | 1235    | 16,978                 | 6,643        | 3357          |
| Ho                         | -1.12±0.04 | 1569               | 1566         | 1419    | 26,308                 | 6,007        | 2355          |
| Spoke                      |            | 2269               | 2269         | 2045    | 6,561                  | 5,615        | 3248          |
| Matrix                     |            | 2271               | 2270         | 2142    | 41,775                 | 11,574       | 4974          |
| Y2H +<br>Co-IP<br>(Matrix) |            | 4627               | 3215         | 2759    | 47,783                 | 13,049       | 5787          |
